# Supplementary material
Source: PubMed Central journal article supplement (PMC6506224)
Supplement: NIHMS1527709-supplement-1.pdf [file NIHMS1527709-supplement-1.pdf]

**Cell Reports, Volume 27**

**Supplemental Information**

**Sequence and Nuclease Requirements for Breakage**

**and Healing of a Structure-Forming (AT)<sub>n</sub>**

**Sequence within Fragile Site FRA16D**

**Simran Kaushal, Charles E. Wollmuth, Kohal Das, Suzanne E. Hile, Samantha B. Regan, Ryan P. Barnes, Alice Haouzi, Soo Mi Lee, Nealia C.M. House, Michael Guyumdzhyan, Kristin A. Eckert, and Catherine H. Freudenreich**

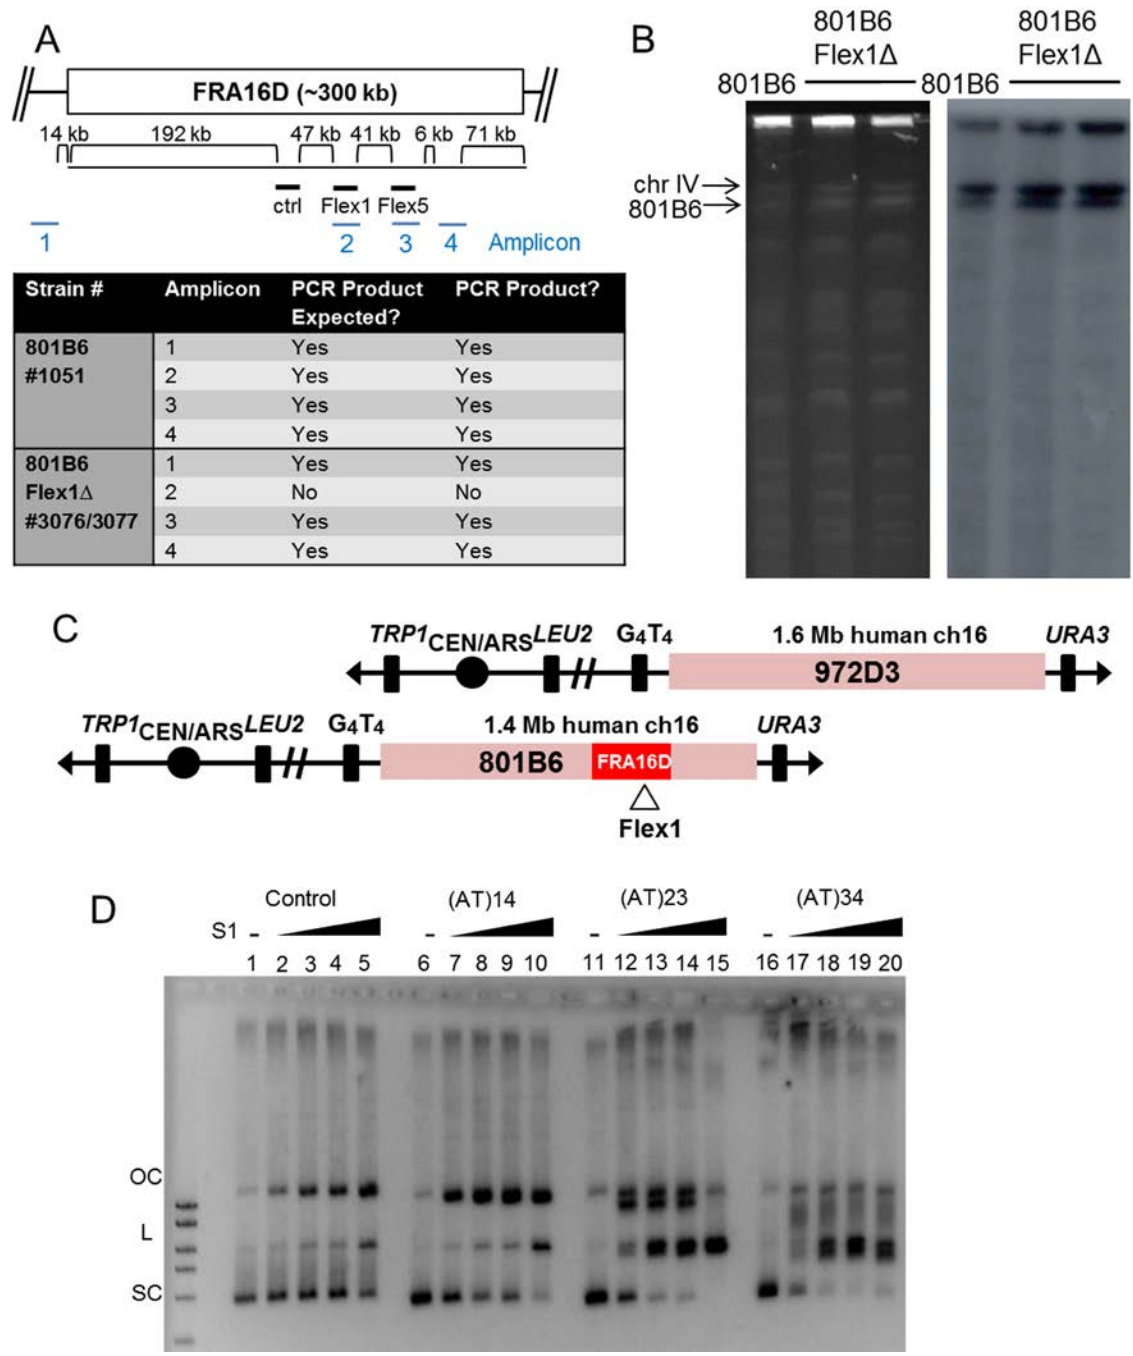

**Figure S1. Confirmation of FRA16D YAC integrity** (related to Figure 1). (A) Large FRA16D YAC structure was verified by PCR amplifying the indicated amplicons. (B) Overall size of the 801B6 YAC (~1400 kb) was verified by pulsed field gel electrophoresis of intact chromosomes (left panel) followed by a Southern blot using a probe to *TRP1* (right panel). The probe binds to the *TRP1* marker on the YAC (~1500 kb) as well as the *trp1-289* allele on chromosome IV. The 801B6 YAC contains Flex1 (AT)34 by PCR and sequencing. (C) Diagram of YACs containing human chromosome 16 sequences. Chromosome 16 boxes are lined up according to their genomic coordinates. (D) S1 nuclease cleavage assay on plasmids (related to middle panel of Figure 1C). Full gel image of a representative 1% agarose gel showing S1 nuclease cleavage titration (0U, 1U, 1.75U, 2.5U and 5U) of plasmids containing indicated Flex1 or control sequences.

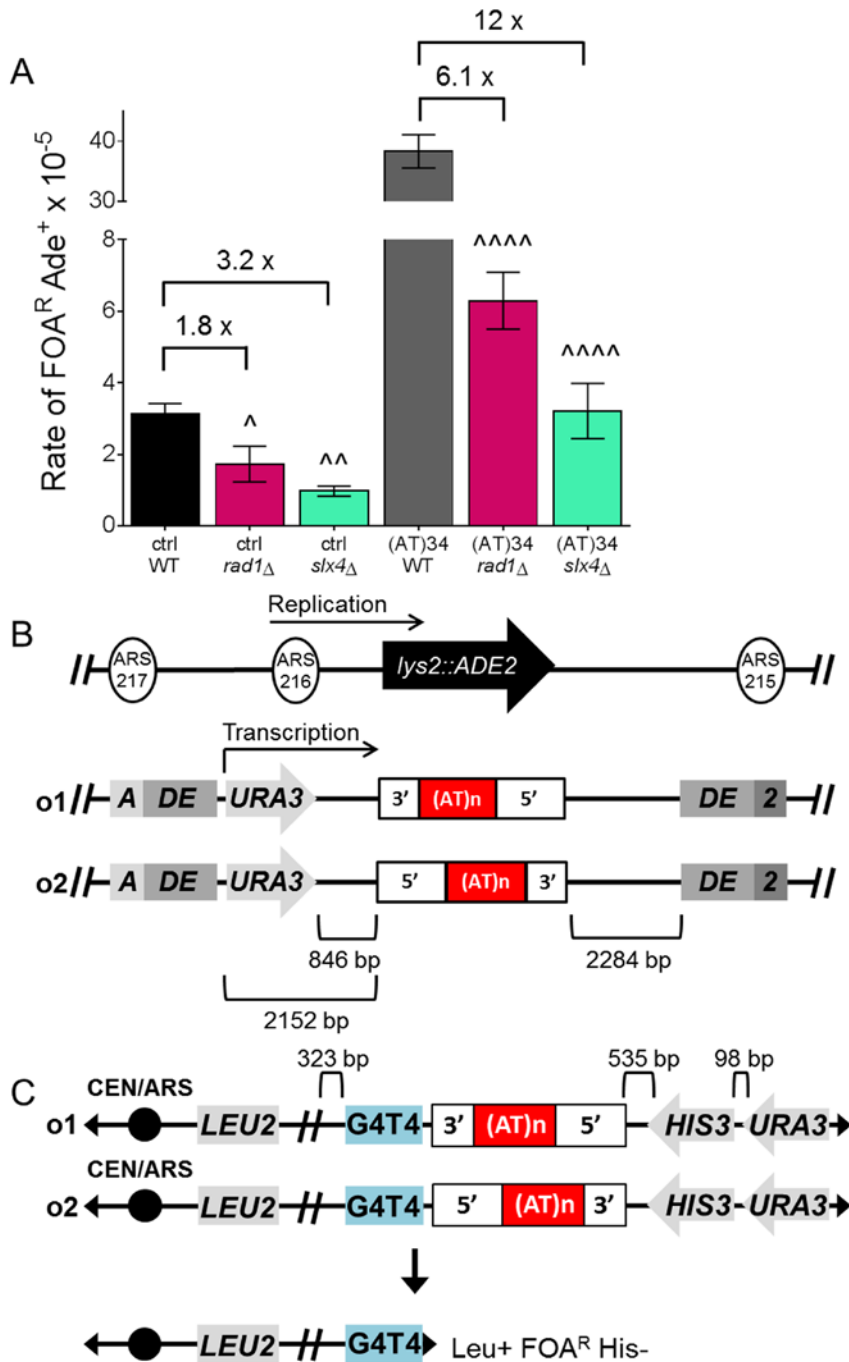

**Figure S2. Fragility Assay constructs and DDRA results for *slx4*Δ and *rad1*Δ strains** (related to Figures 1-5). (A) DDRA rates for *slx4*Δ and *rad1*Δ strains. Fold decreases compared to WT and statistical decrease compared to WT values using an unpaired t-test are indicated ^  $p < 0.05$ , ^^  $p < 0.01$ , ^^^  $p < 0.001$ , and ^^^^  $p < 0.0001$ . Rates in Table S2. (B) A detailed depiction of the DDRA fragility assay cassette at the *LYS2* locus on chromosome II is shown. (C) A detailed depiction of the YAC end loss assay and the yeast artificial chromosome showing Flex1 in orientations 1 (o1) and 2 (o2).

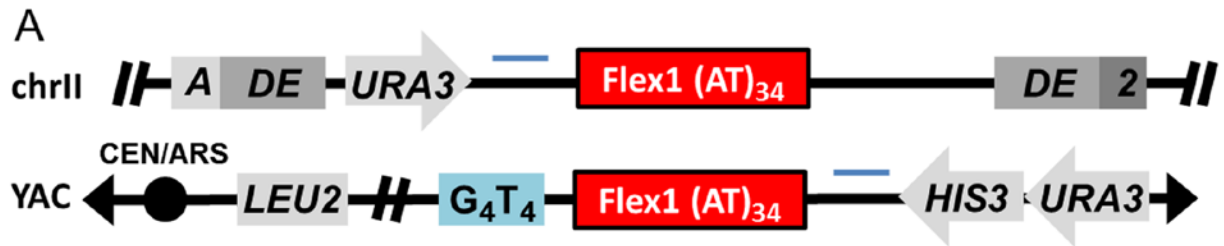

B Transcription levels by RT-qPCR

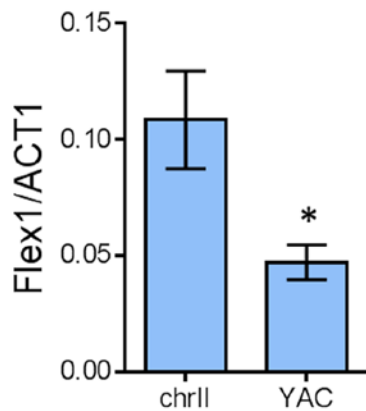

**Figure S3. Flex1 is transcribed at the both the chromosome II DDRA locus and the YAC locus** (related to Figure 1D). (A) Blue bars indicate area amplified from cDNA and quantified by qPCR using primers 1254 and 1255 (Table S4). Primer locations were chosen based on previous data that transcription arises from read-through of the *URA3* gene (Su and Freudenreich, 2017). (B) Flex1 transcripts as detected by RT-qPCR, normalized to ACT1. Data are from 3 separate RNA preparations with 1-2 separate cDNA and qPCR preparations per RNA sample (see Table S7). Chromosome II and YAC strains used are Flex1 S5'(AT)<sub>34</sub>S3' orientation 1. \*p < 0.05 compared to chrII.

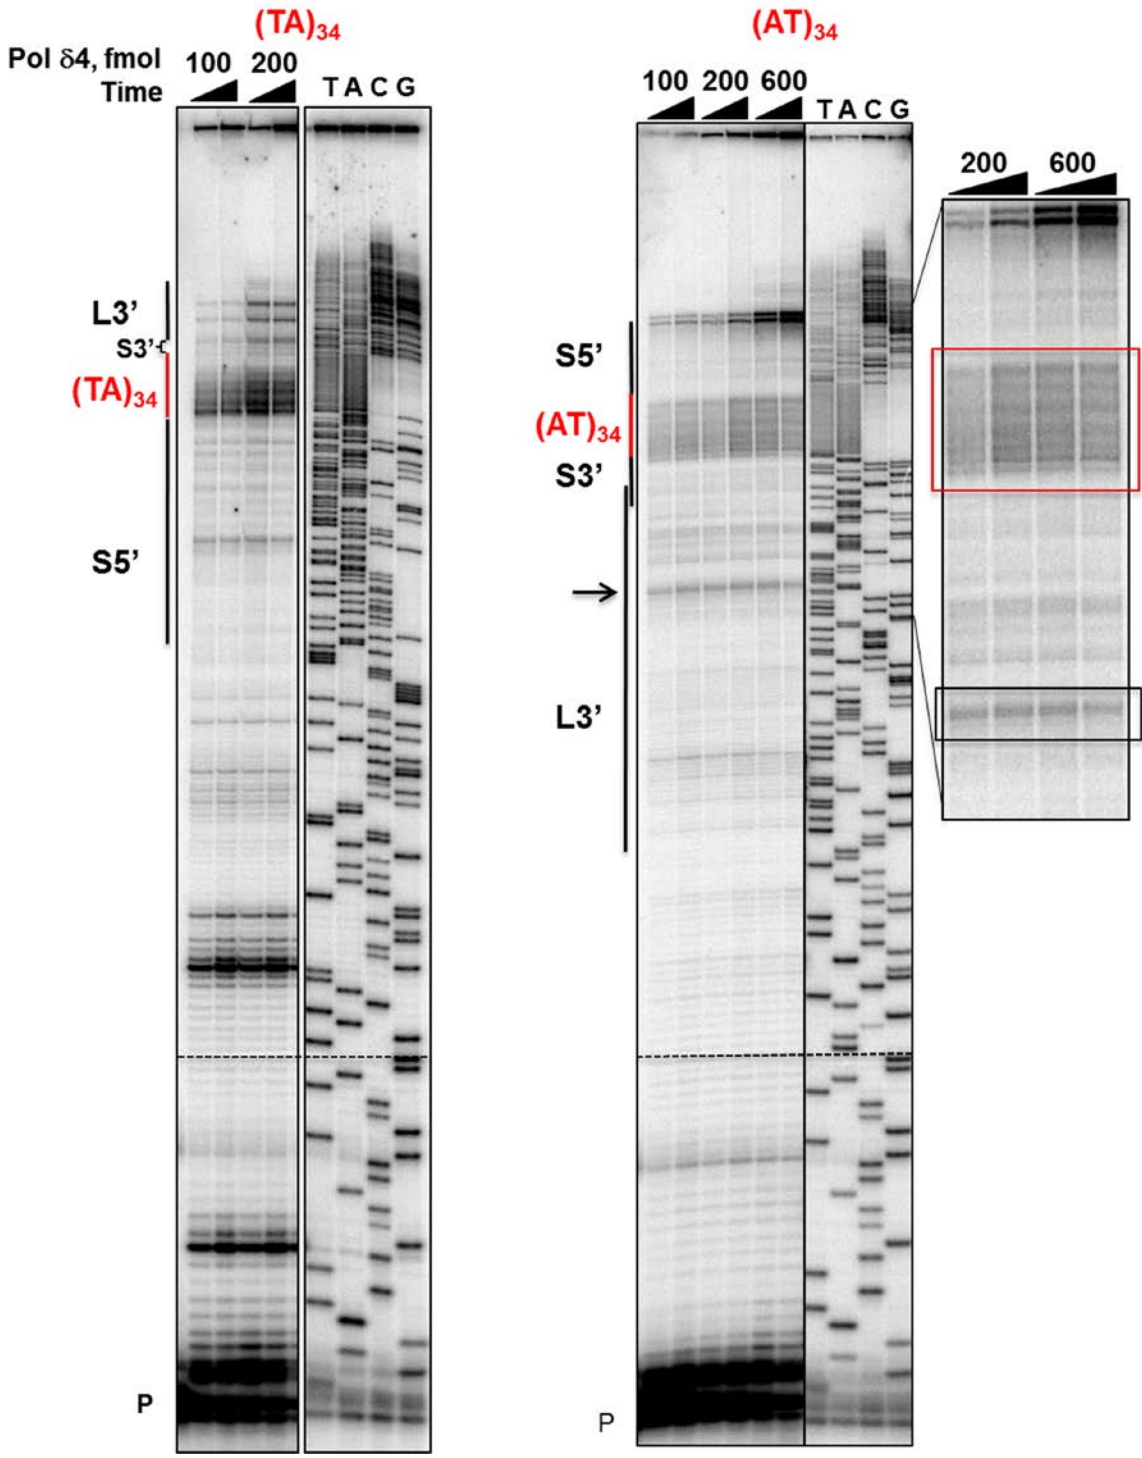

**Figure S4. Flex1 (AT)<sub>34</sub> stalls human polymerase delta on both DNA strands** (related to Figures 2 and 5). *In vitro* DNA synthesis of Flex1 with (AT)<sub>34</sub> and a L3' flanking sequence by the 4-subunit human polymerase  $\delta$  holoenzyme (Pol  $\delta$ 4), showing pause sites at the predicted hairpin in the L3' sequence (arrow and black boxed area, right-hand gel). Pausing at the AT run is evident whether the (TA)<sub>34</sub> or (AT)<sub>34</sub> repeat is the template strand. Sequence outside of the marked area is composed of the plasmid backbone. TACG, dideoxy sequencing ladder of the DNA template.

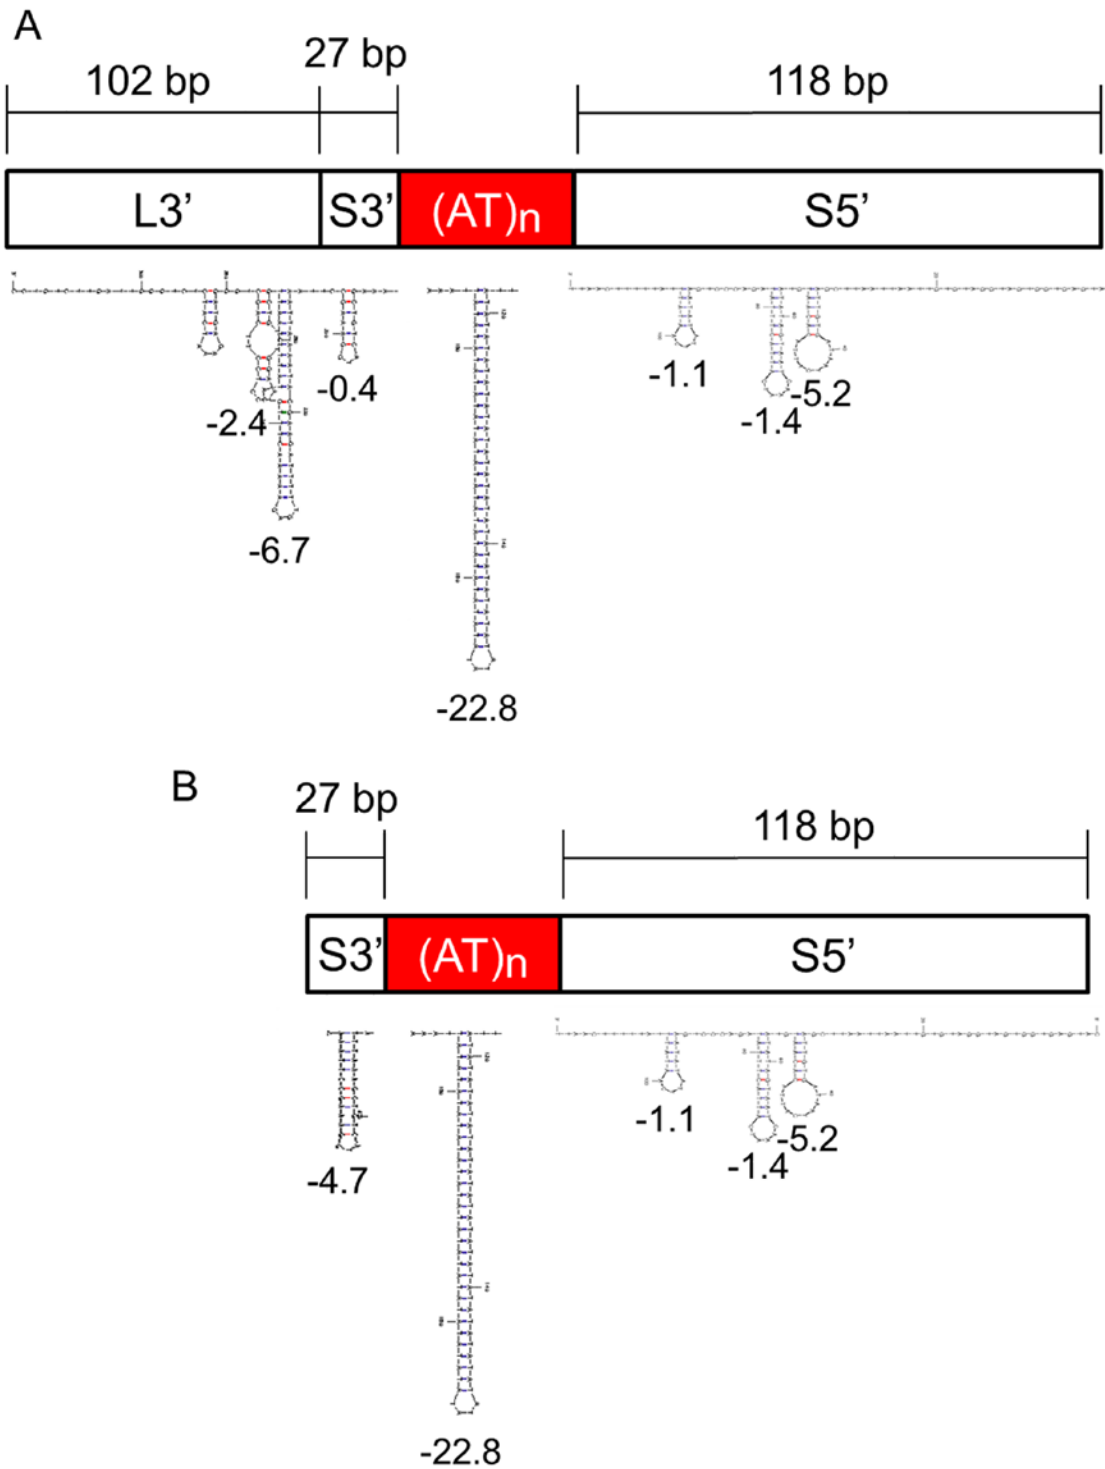

**Figure S5. Secondary structure predictions for Flex1 with various flanking sequences** (related to Figure 5). Secondary structure predictions for sequences contained within Flex1 with a L3' (A) and S3' (B) flanking sequence by MFold.  $\Delta G$  values of each predicted hairpin are reported below the structure using folding conditions: 37°C folding temperature, 1 mM Na<sup>+</sup>. Note that the sequence between hairpins is non-contiguous for illustration purposes.

**Table S1. % FOA<sup>R</sup> colonies for large FRA16D YACs. Related to Figure 1A.**

| YAC strain   | # of Experiments | Average % FOA <sup>R</sup> | SEM    | p value | p compared to |
|--------------|------------------|----------------------------|--------|---------|---------------|
| 972D3        | 3                | 4.1                        | 0.2646 |         |               |
| 801B6        | 6                | 18.1                       | 1.4241 | 0.0003  | 972D3         |
| 801B6 Flex1Δ | 5                | 12.9                       | 0.5687 | 0.01613 | 801B6         |

**Table S2. DDRA fragility assay data. Related to Figures 1B, 2C, 3, 4, 5A, 5B, 5D and S2A.**

| FRA16D sequence | Deleted gene(s) or treatment     | # of Experiments | Average FOA <sup>R</sup> x 10 <sup>-5</sup> | SEM     | p value | p compared to |
|-----------------|----------------------------------|------------------|---------------------------------------------|---------|---------|---------------|
| ctrl            |                                  | 6                | 3.1                                         | 0.2883  |         |               |
| ctrl            | +HU                              | 4                | 22.7                                        | 5.4501  | 0.0020  | ctrl          |
| Flex1 (AT)14    |                                  | 3                | 4.5                                         | 0.6028  | 0.0499  | ctrl          |
| Flex1 (AT)14    | +HU                              | 3                | 26.3                                        | 1.6586  | 0.0002  | Flex1 (AT)14  |
| Flex1 (AT)23    |                                  | 5                | 16.2                                        | 1.2178  | <0.0001 | ctrl          |
| Flex1 (AT)23    | +HU                              | 3                | 31.9                                        | 1.2785  | 0.0002  | Flex1 (AT)23  |
| Flex1 (AT)34    |                                  | 7                | 38.3                                        | 2.7815  | <0.0001 | ctrl          |
| Flex1 (AT)34    | +HU                              | 3                | 122.4                                       | 37.0016 | 0.0058  | Flex1 (AT)34  |
| ctrl            | <i>mus81Δ</i>                    | 3                | 3.8                                         | 0.3180  | 0.2203  | ctrl          |
| Flex1 (AT)14    | <i>mus81Δ</i>                    | 3                | 4.2                                         | 0.3606  | 0.6913  | Flex1 (AT)14  |
| Flex1 (AT)23    | <i>mus81Δ</i>                    | 3                | 3.9                                         | 0.1667  | 0.0003  | Flex1 (AT)23  |
| Flex1 (AT)34    | <i>mus81Δ</i>                    | 3                | 13.8                                        | 0.7219  | 0.0005  | Flex1 (AT)34  |
| Flex1 (AT)34    | <i>mms4Δ</i>                     | 4                | 6.7                                         | 0.9127  | <0.0001 | Flex1 (AT)34  |
| Flex1 (AT)34    | <i>mms4-9A</i>                   | 5                | 36.5                                        | 3.6398  | 0.6983  | Flex1 (AT)34  |
| Flex1 (AT)34    | <i>rtt107Δ</i>                   | 5                | 27.5                                        | 3.6814  | 0.0372  | Flex1 (AT)34  |
| Flex1 (AT)34    | <i>rtt107Δ</i><br><i>mms4-9A</i> | 4                | 35.7                                        | 5.0382  | 0.6258  | Flex1 (AT)34  |
| Flex1 (AT)34    | <i>rad51Δ</i>                    | 3                | 37.2                                        | 0.57735 | 0.8070  | Flex1 (AT)34  |
| Flex1 (AT)34    | <i>rad51Δ</i><br><i>mus81Δ</i>   | 3                | 17.4                                        | 4.0720  | 0.0032  | Flex1 (AT)34  |
| Flex1 (AT)34    | <i>yen1Δ</i>                     | 4                | 80.9                                        | 10.3907 | 0.0007  | Flex1 (AT)34  |
| Flex1 (AT)34    | <i>slx1Δ</i>                     | 3                | 29.3                                        | 0.7881  | 0.0750  | Flex1 (AT)34  |
| Flex1 (AT)34    | <i>rad1Δ</i>                     | 3                | 6.3                                         | 0.7937  | <0.0001 | Flex1 (AT)34  |
| Flex1 (AT)34    | <i>slx4Δ</i>                     | 5                | 3.2                                         | 0.7736  | <0.0001 | Flex1 (AT)34  |

|                        |                               |   |       |         |         |                        |
|------------------------|-------------------------------|---|-------|---------|---------|------------------------|
| Flex1 (AT)34           | <i>mus81Δ</i><br><i>yen1Δ</i> | 3 | 12.3  | 1.2583  | 0.0004  | Flex1 (AT)34           |
| Flex1 (AT)34           | <i>mus81Δ</i><br><i>slx1Δ</i> | 3 | 10.4  | 2.5989  | 0.0003  | Flex1 (AT)34           |
| ctrl                   | <i>yen1Δ</i>                  | 3 | 3.3   | 0.2517  | 0.7238  | ctrl                   |
| ctrl                   | <i>slx1Δ</i>                  | 3 | 2.9   | 0.4583  | 0.6659  | ctrl                   |
| ctrl                   | <i>rad1Δ</i>                  | 3 | 1.7   | 0.4978  | 0.0341  | ctrl                   |
| ctrl                   | <i>slx4Δ</i>                  | 3 | 1.0   | 0.1362  | 0.0016  | ctrl                   |
| ctrl                   | <i>sae2Δ</i>                  | 3 | 3.3   | 1.0817  | 0.8455  | ctrl                   |
| Flex1 (AT)34           | <i>sae2Δ</i>                  | 4 | 7.6   | 1.2743  | <0.0001 | Flex1 (AT)34           |
| Flex1 (AT)34<br>S3' o2 |                               | 4 | 11.6  | 2.4052  | <0.0001 | Flex1 (AT)34           |
| Flex1 (AT)34<br>L3' o2 |                               | 9 | 2.1   | 0.5431  | 0.0002  | Flex1 (AT)34<br>S3' o2 |
| I-SceI only            |                               | 6 | 344.5 | 81.6916 |         |                        |
| I-SceI S3'             |                               | 7 | 385.3 | 57.1993 | 0.6832  | I-SceI only            |
| I-SceI L3'             |                               | 7 | 98.3  | 41.6164 | 0.0016  | I-SceI S3'             |

All Flex1 constructs contain the S3' flanking sequence and are in orientation 1 unless otherwise noted.

**Table S3. YAC fragility assay data.** Related to Figures 4B and 5C.

| <b>FRA16D sequence</b> | <b>Deleted gene(s)</b>                        | <b># of Experiments</b> | <b>Average FOA<sup>R</sup> His<sup>+</sup> x 10<sup>-6</sup></b> | <b>SEM</b> | <b>p value</b> | <b>p compared to</b> |
|------------------------|-----------------------------------------------|-------------------------|------------------------------------------------------------------|------------|----------------|----------------------|
| Flex1 (AT)34<br>S3' o1 |                                               | 3                       | 11.1                                                             | 0.9207     | 0.0167         | (AT)23-S3' o1        |
| Flex1 (AT)34           | <i>yen1Δ</i>                                  | 3                       | 12.2                                                             | 1.3043     | 0.5287         | (AT)34-S3' o1        |
| Flex1 (AT)34           | <i>mus81Δ</i>                                 | 3                       | 5.8                                                              | 0.4177     | 0.0061         | (AT)34-S3' o1        |
| Flex1 (AT)34           | <i>slx1Δ</i>                                  | 3                       | 6.5                                                              | 0.9244     | 0.0232         | (AT)34-S3' o1        |
| Flex1 (AT)34           | <i>rad1Δ</i>                                  | 3                       | 4.6                                                              | 1.0366     | 0.0094         | (AT)34-S3' o1        |
| Flex1 (AT)34           | <i>slx4Δ</i>                                  | 3                       | 5.9                                                              | 0.5859     | 0.0087         | (AT)34-S3' o1        |
| Flex1 (AT)34           | <i>mus81Δ</i><br><i>rad1Δ</i>                 | 5                       | 5.2                                                              | 0.9528     | 0.0108         | (AT)34-S3' o1        |
| Flex1 (AT)34           | <i>slx1Δ</i><br><i>rad1Δ</i>                  | 3                       | 7.8                                                              | 1.9150     | 0.2511         | (AT)34-S3' o1        |
| Flex1 (AT)34           | <i>slx1Δ</i><br><i>mus81Δ</i><br><i>rad1Δ</i> | 5                       | 7.7                                                              | 2.4192     | 0.3402         | (AT)34-S3' o1        |
| Flex1 (AT)23<br>S3'    |                                               | 3                       | 6.4                                                              | 0.7513     |                |                      |



|                        |  |   |      |        |        |               |
|------------------------|--|---|------|--------|--------|---------------|
| Flex1 (AT)34<br>L3'    |  | 3 | 0.3  | 0.0876 | 0.0003 | (AT)34-S3' o1 |
| Flex1 (AT)34<br>S3' o2 |  | 3 | 15.4 | 1.3528 | 0.0044 | (AT)23-S3' o1 |
| Flex1 (AT)34<br>L3' o2 |  | 3 | 14.4 | 5.0560 | 0.8578 | (AT)34-S3' o2 |

All Flex1 constructs contain the S3' flanking sequence and are in orientation 1 unless otherwise noted.

**Table S4. Oligonucleotides.** Related to STAR Methods.

| Oligo Name                     | CF Oligo Stock # | Purpose                                   | Sequence                             |
|--------------------------------|------------------|-------------------------------------------|--------------------------------------|
| ura3rev                        | 3                | Check for <i>URA3</i> absence             | TCCTGTTGCTGCCAAGCTAT                 |
| ura3rev                        | 4                | Check for <i>URA3</i> absence             | TCCCAGCCTGCTTTTCTGTA                 |
| ura3for2                       | 5                | Check for <i>URA3</i> absence             | TGCTGCTACTCATCCTAG                   |
| URA3<br>internal<br>reverse    | 1223             | Check for <i>URA3</i> absence             | GCTTAACTGTGCCCTCCATGG                |
| RT-<br>PCR_F1_up<br>stream_for | 1254             | To measure levels of<br>Flex1 transcripts | AACTGTTGGGAAGGGCGAT<br>C             |
| RT-<br>PCR_F1_up<br>stream_rev | 1255             | To measure levels of<br>Flex1 transcripts | TGAGTCGTATTACAATTCA<br>CTGGC         |
| TRP1_222b<br>_int_for          | 1711             | Southern TRP1 probe for                   | GGCGTGTTCGTAATCAAC<br>C              |
| TRP1_127b<br>p_int_rev         | 1712             | Southern TRP1 probe rev                   | GGCGTCAGTCCACCAGCTA<br>A             |
| P1_for_252<br>bp_chk           | 1807             | FRA16D amplicon 1 for                     | GCATATGAGAATACTCATA<br>CT CAG TGCTGC |
| P1_110bp_c<br>hk               | 1704             | FRA16D amplicon 1 rev                     | CCATGCACTCTGGTGTACC<br>A             |
| P3_for_642<br>bp_chk           | 1840             | FRA16D amplicon 2 for                     | GTGTGAATACCAGGTGGTA<br>GGGATTATGTG   |
| P3_rev_120<br>bp_chk           | 1841             | FRA16D amplicon 2 rev                     | ACAGAACTAACCCAGAGAT<br>GGTTTCTCATC   |
| F5His_For                      | 1545             | FRA16D amplicon 3 for                     | GGGAGTCCTAGATCAAGGT<br>G             |
| P4_rev_752<br>bp_chk           | 1809             | FRA16D amplicon 3 rev                     | GAACTCAGATAAAGATAAG<br>GCCTATGGTTC   |
| P5P5B_for_<br>672bp_chk        | 1810             | FRA16D amplicon 4 for                     | AAAAC TTTGCTGGAGAACA<br>TCACCAATCAC  |

|                          |      |                                                                |                                    |
|--------------------------|------|----------------------------------------------------------------|------------------------------------|
| P5P5B_rev_428bp_chk      | 1811 | FRA16D amplicon 4 rev                                          | TTCTGAGAAACTGTCACAG<br>CCAAGAAGATG |
| F1_420down               | 1267 | Checking Flex1::KANMX6 in FRA16D YAC                           | GCTGAAGTCACAAGATCTT<br>AGGATGGGGTG |
| pBL007for                | 679  | Screening for pBL007 transformants with insert                 | AAGCATATTTGAGAAGATG<br>CGGCCAGC    |
| pBL007rev                | 680  | Screening for pBL007 transformants with insert                 | GGAATAAGGGCGACACGG<br>AAATGTTGA    |
| Flex1_pBL007_seq_For     | 1032 | PCR and sequencing of insert in pBL007 and chrII locus         | ACTCACTATAGGGCGAATT<br>G           |
| Flex1_pBL007_seq_Rev     | 1033 | PCR and sequencing of insert in pBL007 and chrII locus         | CCAAGTATCTTCAGCATC<br>T            |
| 5'LYS2_pBL007_integr_For | 1028 | PCR of 5' cassette in chrII locus                              | AAGTAACAAGCAGCCAATA<br>G           |
| 5'LYS2_pBL007_integr_Rev | 1029 | PCR of 5' cassette in chrII locus                              | CATGTGTCAGAGGTTTTCA<br>C           |
| 3'LYS2_pBL007_integr_For | 1030 | PCR of 3' cassette in chrII locus                              | CTCGGAATTAACCCTCACT<br>A           |
| 3'Lys2junctionrev        | 1047 | PCR of 3' cassette in chrII locus                              | GCAAAGTGGTGATAGAGTT<br>C           |
| T7                       | 2    | PCR and sequencing of insert in pHZ-HIS3MX6 and YAC            | TAATACGACTCACTATAGG<br>G           |
| M13R                     | 1343 | PCR and sequencing of insert in pHZ-HIS3MX6 and YAC            | CAGGAAACAGCTATGACC                 |
| His3Revsk                | 375  | PCR from <i>HIS3MX6</i> to <i>URA3</i> to confirm modified YAC | TTAGATAAATCGACTACGG<br>CAC         |
| URA3 for                 | 832  | PCR from <i>HIS3MX6</i> to <i>URA3</i> to confirm modified YAC | CAGTACTCTGCGGGTGTAT<br>ACAG        |
| ILV1_for                 | 1465 | PCR of 5' junction of pGAL-I-SceI nuclease                     | CTCTGCGCTATATCTTTGGG               |

|                                 |      |                                                                      |                                                                                                                                                                                                                                               |
|---------------------------------|------|----------------------------------------------------------------------|-----------------------------------------------------------------------------------------------------------------------------------------------------------------------------------------------------------------------------------------------|
|                                 |      | cassette                                                             |                                                                                                                                                                                                                                               |
| GAL1,10_c<br>hk                 | 1466 | PCR of 5' junction of<br>pGAL-I-SceI nuclease<br>cassette            | CGCTTCGCTGATTAATTACC<br>CCAG                                                                                                                                                                                                                  |
| I-SceI_for2                     | 1511 | Creation of I-SceI insert<br>for cloning (3' end<br>anneals to 1512) | gatctaGAATTCggtactgcgggatc<br>gtccattccgacagTAGGGATAAC<br>AGGGTAAT                                                                                                                                                                            |
| I-SceI_rev2                     | 1512 | Creation of I-SceI insert<br>for cloning (3' end<br>anneals to 1511) | tatcgaGAATTCagcgcgacgtcgctt<br>gcggtattcggATTACCCTGTTAT<br>CCCTActgt                                                                                                                                                                          |
| I-SceI_for2<br>_short           | 1513 | Creation of I-SceI insert<br>for cloning                             | gatctaGAATTCggtactgc                                                                                                                                                                                                                          |
| I-SceI_rev2<br>_short           | 1514 | Creation of I-SceI insert<br>for cloning                             | tatcgaGAATTCagcgcgac                                                                                                                                                                                                                          |
| M13<br>Forward (-<br>20)        | n.a. | Pol $\delta$ 4 polymerase<br>pausing assay                           | GTAAAACGACGGCCAG                                                                                                                                                                                                                              |
| G40                             | n.a. | Pol $\delta$ 4 polymerase<br>pausing assay                           | GCATGCCTGCAGGTCG                                                                                                                                                                                                                              |
| G40-16mer,<br>PAGE-<br>purified | n.a. | Pol $\delta$ 4 polymerase<br>pausing assay                           | GCATGCCTGCAGGTCG                                                                                                                                                                                                                              |
| gBlock                          | n.a. | EcoRI-S5-I-SceI-S3-<br>EcoRI                                         | AGCGTAGAATTCTGTTACC<br>ATGAGTGGTGATGGATGTG<br>TTAATTAATTCGATTGTGAT<br>AATCATTACACAATGTATA<br>TAGTAATCAAATCATTACT<br>TTATAGACCCTGAATATAT<br>TCAATATTTATTTTCAATT<br>TAGGGATAACAGGGTAATT<br>TAAAGCTGTCATGGAAAGC<br>CTTAAAGCAGTATGAATTC<br>TCTGAC |
| gBlock                          | n.a. | EcoRI-S5-ISceI-L3-<br>EcoRI                                          | AGCGTAGAATTCTGTTACC<br>ATGAGTGGTGATGGATGTG<br>TTAATTAATTCGATTGTGAT<br>AATCATTACACAATGTATA<br>TAGTAATCAAATCATTACT<br>TTATAGACCCTGAATATAT<br>TCAATATTTATTTTCAATT                                                                                |

|  |  |  |                                                                                                                                                                                                                             |
|--|--|--|-----------------------------------------------------------------------------------------------------------------------------------------------------------------------------------------------------------------------------|
|  |  |  | <p>TAGGGATAACAGGGTAATT<br/> TAAAGCTGTCATGGAAAGC<br/> CTTAAAGTTAAAATACGAA<br/> GATTTTTGAGAAAACTTT<br/> GCATATTTTAATTGCTGTCT<br/> GGAATCCTCCTTCAGCTGG<br/> GATGAGAAATCATCTCTGG<br/> GTTAGTTCTGTCCCAGTATG<br/> AATTCTCTGAC</p> |
|--|--|--|-----------------------------------------------------------------------------------------------------------------------------------------------------------------------------------------------------------------------------|

**Table S5. Plasmids.** Related to STAR Methods.

| <b>Plasmid</b>                         | <b>CF Plasmid stock#</b> | <b>Description</b>                                                                  | <b>Source</b>       |
|----------------------------------------|--------------------------|-------------------------------------------------------------------------------------|---------------------|
| pFA6a-KANMX6                           | 136                      | Template for one-step gene replacement by PCR                                       | (Wach et al., 1994) |
| pBL007                                 | 223                      | <i>ADE2</i> nt 512-1480<br><i>URA3</i>                                              | this study          |
| pBL007+ctrl                            | 387/388                  | <i>ADE2</i> nt 512-1480<br><i>URA3</i> -EcoRI-ctrl-<br>BamHI                        | this study          |
| pBL007+S5'-(AT)14-S3' o1               | 565/566                  | <i>ADE2</i> nt 512-1480<br><i>URA3</i> -EcoRI-<br>Flex1(AT)14-EcoRI                 | this study          |
| pBL007+S5'-(AT)23-S3' o1               | 516/517                  | <i>ADE2</i> nt 512-1480<br><i>URA3</i> -EcoRI-<br>Flex1(AT)23-EcoRI                 | this study          |
| pBL007+S5'-(AT)34-S3' o1               | 351                      | <i>ADE2</i> nt 512-1480<br><i>URA3</i> -EcoRI-<br>Flex1(AT)34-EcoRI                 | this study          |
| pHZ- <i>HIS3MX6</i>                    | 466                      | G <sub>4</sub> T <sub>4</sub> <i>HIS3MX6 URA3</i>                                   | this study          |
| pHZ- <i>HIS3MX6</i> +S5'-(AT)34-S3' o1 | 513                      | G <sub>4</sub> T <sub>4</sub> <i>HIS3MX6 URA3</i><br>EcoRI-Flex1(AT)34-S3' o1-EcoRI | this study          |
| pHZ- <i>HIS3MX6</i> +S5'-(AT)34-S3' o2 | 559, 560                 | G <sub>4</sub> T <sub>4</sub> <i>HIS3MX6 URA3</i><br>EcoRI-Flex1(AT)34-S3' o2-EcoRI | this study          |
| pHZ- <i>HIS3MX6</i> +S5'-(AT)34-L3' o2 | 512                      | G <sub>4</sub> T <sub>4</sub> <i>HIS3MX6 URA3</i><br>EcoRI-Flex1(AT)34-L3' o1-EcoRI | this study          |

|                       |     |                                                                             |                        |
|-----------------------|-----|-----------------------------------------------------------------------------|------------------------|
| pBL007+I-SceI         | 519 | <i>ADE2</i> nt 512-1480<br><i>URA3</i> -EcoRI-I-SceI-<br>EcoRI              | this study             |
| pBL007+S5'-I-SceI-S3' | 571 | <i>ADE2</i> nt 512-1480<br><i>URA3</i> -EcoRI-Flex1<br>S5'-I-SceI-S3'-EcoRI | this study             |
| pBL007+S5'-I-SceI-L3' | 581 | <i>ADE2</i> nt 512-1480<br><i>URA3</i> -EcoRI-Flex1<br>S5'-I-SceI-L3'-EcoRI | this study             |
| pGSHU                 | 524 | pFA6a-pGAL1-I-SceI-<br>HYG-klURA3                                           | (Storici et al., 2003) |

**Table S6. AT series termination probability.** Related to Figures 2A and 2B.

|        | AT14        |             |             | AT23        |             |             | AT34        |             |             |
|--------|-------------|-------------|-------------|-------------|-------------|-------------|-------------|-------------|-------------|
|        | % synthesis | Term. Prob. |             | % synthesis | Term. Prob. |             | % synthesis | Term. Prob. |             |
|        |             | AT only     | S5'(AT) S3' |             | AT only     | S5'(AT) S3' |             | AT only     | S5'(AT) S3' |
| Rep. 1 | 96          | 0.25        | 0.74        | 119         | 0.40        | 0.77        | 115         | 0.73        | 0.87        |
| Rep. 2 | 86          | 0.25        | 0.71        | 97          | 0.28        | 0.61        | 113         | 0.64        | 0.82        |
| Rep. 3 | 87          | 0.21        | 0.68        | 83          | 0.27        | 0.56        | 113         | 0.62        | 0.83        |
| AVG    | 90          | 0.24        | 0.71        | 100         | 0.32        | 0.65        | 114         | 0.66        | 0.84        |
| s.d.   | 5.5         | 0.023       | 0.028       | 18          | 0.069       | 0.11        | 1.15        | 0.059       | 0.026       |

One way ANOVA values are as follows: AT14 vs. AT23  $p=0.2573$ , AT14 vs. AT34  $p=0.0002$ , AT23 vs AT34  $p=0.0006$ .

**Table S7. RT-qPCR data.** Related to Figure S3 and STAR Methods RT-PCR experiment.

| Flex1 locus | # of Experiments | Mean transcript levels | SEM    | p value | p compared to |
|-------------|------------------|------------------------|--------|---------|---------------|
| chrII       | 5                | 0.11                   | 0.0210 |         |               |
| YAC         | 5                | 0.05                   | 0.0074 | 0.025   | chrII         |
